# Supplementary material
Source: PubMed Central journal article supplement (PMC6800353)
Supplement: pnas.1907858116.sapp.pdf [file pnas.1907858116.sapp.pdf]

1

## 2 **Supplementary Information for**

### 3 **Laminar Specific fMRI Reveals Directed Interactions in Distributed Networks During** 4 **Language Processing**

5 **Daniel Sharoh, Tim van Mourik, Lauren J. Bains, Katrien Segaert, Kirsten Weber, Peter Hagoort, David G. Norris**

6 **Correspondence to Peter Hagoort**

7 **E-mail: [peter.hagoort@mpi.nl](mailto:peter.hagoort@mpi.nl)**

#### 8 **This PDF file includes:**

9     Supplementary text

10    Figs. S1 to S5

11    Captions for Databases S1 to S2

12    References for SI reference citations

#### 13 **Other supplementary materials for this manuscript include the following:**

14     Databases S1 to S2

## 15 Supporting Information Text

### 16 Methods and materials

#### 17 Experimental design.

18 **Task paradigm.** Twenty-four native Dutch subjects (13 female, 18-30 years of age, 21 right handed) performed a single word  
19 reading task which presented words, pseudo-words and false-font items as task conditions. Two subjects were ultimately  
20 excluded from analysis owing to computer failure and signal dropout, leaving 22 data sets for analysis. Data for one subject  
21 was unrecoverable following computer failure during image reconstruction. The second subject experienced signal dropout in  
22 the left occipitotemporal sulcus and so was excluded from all analysis. Subjects had normal or corrected to normal vision and  
23 were screened for reading impairment. Left handed participants were included because regions of interest were determined  
24 through functional localization. Language function was observed to be left lateralized in all participants. Informed consent for  
25 all experimental procedures was obtained in accordance with the procedures of ethical approval of the Donders Centre for  
26 Cognitive Neuroimaging and the Erwin L. Hahn Institute.

27 Initially, the experiment was intended to use a  $3 \times 2$  task design of Lexicality (words, pseudo-words, false-font items)  $\times$  Length  
28 (short, long) with 120 items for each level, and where ‘short’ and ‘long’ designated the length of the words in terms of number  
29 of syllables. The length manipulation was intended to vary the bottom-up signal contribution to the LOTS. It was determined  
30 through piloting that the length manipulation was ineffective and was not analyzed as part of this study. The number of  
31 participants was chosen on the basis of previous work using similar acquisition techniques (1). Our task thus included three  
32 relevant conditions, two of which (words, pseudo-words) were conditions of interest for our analysis, and one of which (false-font  
33 items) was used to localize the functional Region Of Interest (fROI) for analysis. Figure S5 visualizes mini-blocks from each  
34 condition.

35 **Item creation.** Word items were selected from a list of high frequency, concrete Dutch nouns taken from the Celex database  
36 (2). Words were selected to maximize frequency, minimize the standard deviation of word frequency, and minimize standard  
37 deviation of these values for short and long items.

38 Pseudo-words were generated using Wuggy (3). Pseudo-word generation was constrained on the basis of phonemic  
39 neighborhood density, consonant/vowel structure and the number of characters of the word items. The word and pseudo-word  
40 stimuli, and the parameters used in Wuggy to generate the pseudo-word stimuli can be found in supplementary materials  
41 (StimulusList.xlsx).

42 False-font items were created by rendering the word items in the false font. The false font (4) was designed to preserve the  
43 low level features of familiar orthographically legal characters, but to be visually different from letter shapes. These items are  
44 included in supplementary materials (FalseFontItems.pdf). Collapsing across the length manipulation, there were 240 items of  
45 each stimulus type. Sample items can be seen in the main text.

46 **Stimulus presentation.** Items were presented during fMRI measurements taken over 12 runs. Runs were delimited by breaks in  
47 data acquisition. Twenty items of each stimulus type were presented per run, with 60 items presented in total per run.

48 Individual stimuli were visually presented for 800ms in the center of the display. One item was presented per trial. Items  
49 were rendered in white on a black background, as shown in the main text.

50 Presentation onset was jittered around the 3960 ms TR based on the design optimization calculations obtained using optseq  
51 (5). A black screen was presented for the remaining 3160 ms of each trial. Stimuli were presented minimally with a 200 ms  
52 delay from the trial onset and offset resulting in a minimum ISI of 400ms and a maximum ISI of 5920 ms. In practice, ISIs fell  
53 between these two extremes. A fixation cross was presented for a full trial (3960 ms) at the beginning of each run and following  
54 each mini-block.

55 Stimuli were presented in 5 item mini-blocks in which all 5 items were of the same condition type. Each mini-block was  
56 followed by a fixation cross presented for the duration of one trial. On three pseudo-random occasions per run, a question mark  
57 was presented that instructed the participant to indicate via button-box whether the previous mini-block contained existing  
58 Dutch words. Button-box responses were not analyzed and were considered only to ensure participant compliance. Prior to the  
59 experiment, subjects were briefed on the type of items they were to see and instructed to silently read the items on the screen.

60 The experiment was performed using Presentation® software (Version 16.1, Neurobehavioral Systems, Inc., Berkeley, CA,  
61 www.neurobs.com). Two versions of the experiment were created with roughly half of the participants assigned to each version.  
62 The versions differed in block and item order. The different experiment versions were intended to capture latent, unintended  
63 effects inherent in presentation order or other version specific properties.

64 **Task design model.** The task design matrix included condition regressors, temporal and spatial dispersion derivatives, physiologic  
65 regressors, motion regressors produced by using SPM version 12 (6), drift terms, frequency filters, outlier censors, and constant  
66 terms modeling the mean signal per run. Outlier time points were determined using *3dToutcount* in AFNI (7). We considered  
67 a voxel to be an outlier if the probability of the distance of its intensity value from the trend exceeded  $p = 0.001$  as defined by  
68 its location within a Gaussian probability distribution. Time points were excluded from analysis if 2% or more of the voxels at  
69 that time point were categorized as outliers.

70 Stimulus onsets were modeled as instantaneous events with zero duration and convolved with the canonical hemodynamic  
71 response function. Condition regressors were created separately for word, pseudo-word and false-font items; and for the long

72 and short items within each condition. In total six condition types were modeled, but only three were analyzed after collapsing  
73 across length.

#### 74 **Acquisition.**

75 **Functional acquisition.** Near whole brain, submillimeter (0.943, 0.900 slice direction) resolution T2\*-weighted GE-BOLD data  
76 were acquired using a GRAPPA accelerated (acceleration factor  $8 \times 1$ ) 3D-EPI acquisition protocol (8) with CAIPI shift  $k_z =$   
77  $0$ ,  $k_y = 4$  (9, 10); effective TE = 20ms, TR = 44ms, effective TR = 3960ms, BW = 1044Hz/Px, FoV = 215mm  $\times$  215mm  $\times$   
78 215mm with 112 phase encode steps in the slice direction (100.8mm),  $\alpha = 13^\circ$ , partial Fourier factor=6/8 in both slice and  
79 phase-encoding directions. The first phase encoding gradient was applied in the posterior to anterior direction. An axial slab  
80 was collected in each subject and positioned to include the occipitotemporal sulcus. The 10cm slab was sufficient to allow  
81 complete brain coverage in several subjects and near complete coverage in the remaining subjects. Data were acquired on a  
82 Siemens Magnetom 7 Tesla scanner (Siemens Healthineers, Erlangen, Germany) with a 32-channel head coil (Nova Medical,  
83 Wilmington, USA) at The Erwin L. Hahn Institute in Essen, Germany. Functional data consisted per subject of 12 3D-EPI  
84 data sets of 77 volumes each, although some sessions were incomplete owing to time constraints or other difficulties. No session  
85 contained fewer than 10 functional data sets.

86 **Anatomy acquisition.** Two anatomic images were acquired in each subject using the MP2RAGE (11) acquisition protocol (voxel  
87 resolution = 0.75mm  $\times$  0.75mm  $\times$  0.75mm, TR = 6000ms, TE = 3.06ms,  $T_{11} = 800$ ms,  $T_{12} = 2700$ ms,  $\alpha_1 = 4^\circ$ ,  $\alpha_2 = 5^\circ$ ,  
88 BW = 240Hz/Px, FoV = 240mm  $\times$  240mm with 192 slices (144mm)) and a T1-weighted inversion recovery EPI (IR-EPI)  
89 protocol based on the parameters used in the functional acquisition protocol. To create the T1 contrast, the following parameters  
90 were modified from the functional acquisition:  $\alpha = 90^\circ$ , T1 = 800ms, TR = 200ms, TE = 20ms. Example images from each  
91 type of anatomic acquisition can be seen in figure S1.

92 It was necessary to increase the number of phase encode steps in the slice direction from 112 to 160 and to expand the FoV  
93 in the slice direction to ensure fully overlapping coverage with the functional data. The IR-EPI images were used for image  
94 registration as they are known to provide high tissue contrast while preserving the geometric distortions of the functional  
95 images (12). High accuracy, cross-modal registration is challenging, particularly with high resolution acquisitions known to  
96 exaggerate geometric distortions. Performing co-registration taking the IR-EPI as the source image mitigated the challenges  
97 caused by these distortions.

98 Field maps were also acquired in some subjects for potential use in distortion correction, though these were not used. The  
99 IR-EPI provided sufficient contrast in the native functional space to facilitate high quality registration without the need for  
100 distortion correction.

101 **Choice of acquisition method for laminar resolution imaging.** fMRI relies on the same neurovascular coupling mechanisms exploited  
102 in standard BOLD imaging. In recent years there has been increased support for the concept that the neurovascular coupling  
103 occurs at a sufficiently fine scale to make fMRI feasible (13). However, the requirement for submillimeter resolution has led to  
104 considerable discussion as to the best MR-contrast for interrogating the hemodynamic response.

105 The standard gradient echo BOLD contrast is highly sensitive to functional activation, but is known to have a considerable  
106 contribution from vessels downstream from the site of activation. The less commonly used spin-echo BOLD sequence only  
107 acquires data from a subset of the contrast mechanisms that contribute to gradient echo BOLD, but is believed to have a  
108 superior intrinsic spatial localization at high static magnetic field strengths (14–16). In addition, contrasts based on cerebral  
109 blood flow and volume (CBF, CBV) should also be considered. It is technically far easier to test and compare these contrasts  
110 in animal models, and historically such experiments largely preceded human fMRI (17–24). The conclusion drawn from these  
111 was that CBV was consistently found to have the superior characteristics in terms of spatial resolution, and gradient echo  
112 BOLD the poorest. Spin-echo BOLD and CBF are somewhere between these two extremes. This hierarchy may be explained  
113 in terms of the current view that blood volume changes occur in the arterioles and capillaries (19, 25–27), and hence CBV  
114 contrast should not be a downstream contrast as is BOLD.

115 The first laminar fMRI studies in humans are comparatively recent (28–30), and utilized gradient echo BOLD contrast.  
116 Since then, the VASO technique for measuring CBV noninvasively (21) has been further developed for application for laminar  
117 fMRI at high static magnetic field strengths (31–33), and a number of spin echo (34–36) and combined spin-echo and gradient  
118 echo studies (37, 38) have been performed. Laminar CBF has to date not been published for human studies. Our rationale  
119 for selecting gradient echo BOLD for the current study was based primarily on its exclusive ability to acquire high spatial  
120 resolution data from large volumes within an acceptable acquisition time. The two main alternatives – CBV and spin-echo – are  
121 currently techniques that are restricted in their volume coverage and suffer from comparatively long acquisition times (33, 36).

122 The whole-brain gPPI results we report suggest, however, that GE-BOLD may be capable of more refined spatial localization  
123 than previously believed. As discussed in the main text, the ability of the gPPI to account for the task effects likely enhanced  
124 our ability to localize signal variance unique to individual depth bins. Simulations from Markuerkiaga et al. (39) based on  
125 reported depth dependent responses in visual cortex to identified a depth dependent peak to tail response ratio of at least 5:1  
126 in all cortical depths at 7T, which would reduce the detectability of unique variance downstream from its source. The gPPI  
127 results suggest that this ratio may be conservative, or perhaps influenced by task properties. Our reading experiment presented  
128 stimuli at a high frequency relative to presentation rates discussed in Markuerkiaga et al. (39), which should have produced  
129 relatively higher frequency task signal. The vasculature attributed to downstream BOLD effects consists of post capillary  
130 vessels draining into larger vessels, whereby differences in the vessel length and flow velocity will act to reduce the coherence of

131 the signal leading the vasculature bed to act as a low-pass filter. High frequency task signal components would therefore be  
132 expected to undergo greater attenuation than lower frequency components, and would experience a larger depth dependent  
133 peak-to-tail response ratio. In light of our results, it seems clear that unique variance related to each bin was well localized,  
134 and that signal contamination was isolated to the main task effects where it could be removed during the gPPI analysis.

135 **Image registration.** High quality registration is critical to laminar fMRI. Given the complications inherent in the registration of  
136 submillimeter data, different combinations of tools were necessary to achieve accurate registrations in different participants.  
137 The criteria for success were constant, however, across all participants and of an entirely anatomical basis. Alignment quality  
138 was determined by visual inspection of brain edges and the left occipitotemporal sulcus. The registration procedure is described  
139 in this section.

140 **Motion correction.** Image realignment was performed using *spm\_realign* from SPM 12 (6), with parameter values set to achieve  
141 the highest quality registration. During this step, a mean functional image was computed to be used as the base image in  
142 cross-modal registration.

143 **Skull removal.** Skull removal was performed on functional and anatomic data prior to cross-modal image registration. Different  
144 skull removal procedures were used depending on image modality. The FreeSurfer (40) watershed function was applied to the  
145 IR-EPI data sets, sometimes following a first pass B1 bias field correction (discussed in *B1 Correction*). Nearly all processed  
146 brains required manual intervention to remove voxels containing unwanted skull or tissue, or to reintroduce voxels removed in  
147 error. Skull removal was performed on all MP2RAGE images in the same manner.

148 Skull removal was performed on the mean functional images produced during realignment. In this procedure, we manually  
149 edited the result of AFNI's *3dAutomask* program. *3dAutomask* is typically used to remove the skull in images with poor tissue  
150 contrast, such as with T2\*-weighted images. Parameters for this program were optimized on a per subject basis, and all results  
151 were manually edited to ensure that only voxels containing skull were removed. We found these results to be adequate on  
152 the basis of visual inspection following manual intervention, where 'adequate' describes results which did not contain residual  
153 skull or exclude voxels containing brain-matter. *3dAutomask* parameters were iteratively optimized until a result was obtained  
154 which reasonably limited the necessary manual intervention.

155 **B1 correction.** B1 correction on the IR-EPI data was unsuccessful on 5 data sets using the standard tools available in the  
156 FreeSurfer suite, resulting in failed skull removal and inaccurate segmentations. We were able reduce B1 inhomogeneity by  
157 applying an additional B1 correction before applying FreeSurfer tools. Our approach was to calculate a first-pass transform  
158 for the mean functional and IR-EPI images (with the skull) and apply the transformation to the mean functional image. We  
159 then utilized the B1 bias captured in the mean functional image to correct the IR-EPI anatomic images. Following the initial  
160 coregistration, the mean functional image was smoothed and voxel-wise intensity scaled between  $0.3v$  and  $0.9v$  of its intensity  
161 value  $v$  to prevent extreme values from unduly influencing bias correction. The IR-EPI was then divided by the scaled image,  
162 and the result was taken as the corrected image. The corrected image could then be coregistered to the original mean functional  
163 image and used as the input dataset for the standard FreeSurfer processing pipeline. We observed a marked improvement in  
164 both the coregistration results and the results of the FreeSurfer segmentation and surface generation after performing this  
165 correction (figure S2). Computation time was drastically reduced as well, in some cases up to 15 hours.

166 **Coregistration.** Within-subject coregistration was performed using the skull-removed mean functional image and the skull-  
167 removed IR-EPI image. Using this image set mitigated registration error owing to image distortion typically observed in  
168 EPI acquisitions. High quality coregistration was crucial to the laminar analysis featured in this experiment, as the accurate  
169 definition of tissue boundaries in functional space follows only from a highly accurate coregistration of the structural and  
170 functional images. Note also that the transformation computed in this step was applied to the structural image to avoid  
171 introducing interpolation errors.

172 Several coregistration tools were used to calculate optimal image alignment. For a given subject, multiple transforms were  
173 calculated and visually inspected. The best alignment as determined by visual inspection was taken for further analysis.  
174 Volume coregistration was performed using FreeSurfer's robust, outlier insensitive registration cost function as implemented in  
175 *mri\_robust\_register*. If the resulting transformation resulted in poor registration, we then used the NMI cost function  
176 implemented in *mri\_robust\_register* and finally the NMI cost function implemented in AFNI's *3dAllineate*. If necessary,  
177 manual improvements were applied to the best transformations generated by these tools. Registration quality was assessed by  
178 visual inspection of alignment along the left occipitotemporal sulcus and brain edges.

179 In 11 subjects, failure to reconstruct surfaces from the IR-EPI image made it necessary to perform surface reconstruction  
180 on MP2RAGE data, and therefore to bring the MP2RAGE surfaces into register with the functional data.. Following the  
181 initial coregistration described above for the IR-EPI images, the IR-EPI images were generally in good alignment with the  
182 task data and could serve as the source image for this purpose. In this case, MP2RAGE surfaces were aligned to the IR-EPI  
183 volumes using FreeSurfer's boundary based registration program. If the IR-EPI volume was not in good alignment with the  
184 functional data, an initial alignment between the MP2RAGE and functional data was first computed using the tools described  
185 in the previous paragraph before performing the boundary based registration. The boundary based registration procedure is  
186 described below in a dedicated section.

187 **Normalization for group analysis.** Functional data for each subject were mapped into MNI space for use in the whole-brain gPPI  
188 group analysis. The skull-removed MP2RAGE image was first brought into alignment with the skull-removed mean functional  
189 image. After inspecting the quality of the registration, the functionally aligned MP2RAGE images were aligned to the MNI128  
190 template available in standard FreeSurfer installations. This transformation was concatenated with that obtained from the  
191 inverted matrix from the initial coregistration and applied to the motion corrected functional data. The result of this spatial  
192 normalization was MNI mapped functional data for each subject.

193 **Tissue segmentation and surface generation.** Tissue segmentation was performed in FreeSurfer using the skull-removed IR-EPI  
194 image. Failures to properly reconstruct subject surfaces were addressed by inserting control points, applying additional  
195 normalization as described in a previous section, or disabling the correction of defects in surface topology if they did not  
196 occur in experiment critical regions. The IR-EPI images commonly included artifacts in noncritical locations that would  
197 result in discontinuities in the surface and unsuccessful surface generation. As these defects did not often occur near LOTS,  
198 it was possible to generate accurate surfaces even after bypassing correction. If surface reconstruction failed following these  
199 interventions, the MP2RAGE dataset was used in place of the IR-EPI, and additional registration steps were applied (discussed  
200 below).

201 **Boundary based registration.** Surfaces reconstructed from the IR-EPI image did not require additional alignment to the functional  
202 data beyond resampling the FreeSurfer generated surfaces from “conformed space” to functional space. “Conformed space,”  
203 native to FreeSurfer, is a 1mm isotropic  $256^3$  grid in the RAS coordinate system.

204 Surfaces reconstructed from MP2RAGE images underwent an additional registration step using *bbregister*, FreeSurfer’s  
205 boundary based registration (BBR) tool. The goal of this procedure was to produce surfaces in register with the functional data.  
206 As the IR-EPI and MP2RAGE data sets were generally well aligned from the coregistration procedure described previously,  
207 the main purpose of the BBR was to find a solution accommodating the distortions affecting surface placement along the fROI.  
208 Using a boundary based cost function, IR-EPI images that were unable to be used for surface generation were aligned with the  
209 boundaries generated from the MP2RAGE images. The inverse of this transformation was then applied to the surfaces to align  
210 the boundaries to the IR-EPI image. If the alignment generated by the boundary based registration procedure was found to  
211 be inaccurate, simple solutions to improve accuracy involved optimizing the registration for the fROI through a weighting  
212 mask, manual intervention, or improving the alignment of the two images prior to the boundary based registration. Failing a  
213 simple solution, we also computed a nonlinear boundary based registration (41). In this approach, the registration algorithm  
214 recursively divided and aligned surface segments to increase registration accuracy.

215 The importance of highly accurate image alignment in laminar resolution imaging cannot be overstated. In the present  
216 work, registration inaccuracies in excess of 1mm had the potential to displace entire bins, leading to meaningless results. Great  
217 care was taken to ensure accurate registrations and alignment of the surfaces with the functional images. As in the other  
218 registration procedures, registration quality was assessed only through visual inspection of key anatomy.

219 **Equivolume contouring.** The gray matter volume of each subject was partitioned into equivolume bins using the OpenFmri  
220 (<https://github.com/TimVanMourik/OpenFmriAnalysis>) implementation of the equivolume contouring approach described in Waehnert  
221 et al. (42). The equivolume method increases the likelihood that the histological profile of each bin is consistent throughout  
222 the given region.

223 We partitioned the gray matter volumes into 3 bins: the smallest number of bins which allowed for the dissociation of the  
224 deep, middle and superficial contributions to the overall BOLD signal. For the purpose of the spatial GLM, it was necessary  
225 to include two additional non-cortical bins representing white matter and CSF volumes respectively. The inclusion of these  
226 additional bins was due to partial volume effects caused by voxels extending outside the cortical strip. Voxels observed within  
227 these boundaries were assigned a value representing the fractional volume observed within a particular set of boundaries.

228 The ultimate output of this procedure was a 4D dataset whose first 3 dimensions represented spatial coordinates and whose  
229 4th dimension represented the different bins. Incrementing over the 4th dimension indices gave the fractional volume of each  
230 voxel found in that particular bin. This volume is referred to as the layer-volume distribution.

231 In our partition scheme, the volume subsuming the six histological layers was partitioned into three bins. We argue that the  
232 histologically coarse bins were sufficient to dissociate top-down and bottom-up signal contributions. At the mesoarchitectural  
233 level of lfMRI, it is not practical to measure individual histological layers. One common approach to this challenge has  
234 been to consider a simplified model of layer interactions which merges supragranular (layers I,II,III), granular (layer IV) and  
235 infragranular (layers V,VI) histological layers into three logical layers based on shared connection tendencies (1, 28, 37, 43, 44).  
236 This model is based in large part on patterns of laminar connectivity discovered in Rockland & Pandya (45) when exploring the  
237 link between anatomy and functional hierarchy, and schematized in the Felleman and Van Essen hierarchy (46). The simplified  
238 laminar model has proven valuable when constrained by functional data, and has informed efforts in lfMRI.

239 **Physiologic noise removal.** Cardiac and respiration data were collected concurrently with the functional data using a pulse  
240 oximeter and pneumatic belt. Physiologic regressor estimation up to the 6th (cardiac) and 8th (respiration) order was performed  
241 using a modified version of the PhysIO toolbox of the TAPAS suite (47). These minor modifications were necessary to account  
242 for unique log file formats produced by the equipment at the scan site. Regressors were then included in the design as nuisance  
243 regressors. Regressor quality was assessed with a partial *F*-test.

244 **Non-laminar analysis.** The task design was fitted using the generalized least squares regression implemented in the OpenFmri  
245 analysis suite. First level  $T$ -statistics were calculated in MATLAB version R2014B (The Mathworks Inc.) for condition and  
246 contrast effects in each subject individually. Several versions of the first level analysis were performed to calculate parameter  
247 fits in both native space and MNI space, and with different levels of spatial smoothing applied. This was necessary owing to  
248 requirements of the different analyses reported in this work.

249 Native space data with were spatially smoothed with a 1mm and 4mm Gaussian kernel. Data smoothed with the 4mm  
250 kernel were mapped to MNI space and used in the whole-brain gPPI analysis. Data smoothed with the 1mm kernel were  
251 analyzed in the first level GLM used to identify the fROIs. Following fROI identification, the fROIs identified in each subject  
252 were resampled to native resolution and used as an inclusive mask of the original resolution, native space functional data. The  
253 voxels included in this mask then underwent depth-dependent signal extraction.

254 **Procedure to define functional region of interest.** Anatomically, the region of interest was located proximal to the fundus of  
255 the occipitotemporal sulcus. It was functionally defined as a cluster of voxels which responded to visually presented words and  
256 pseudo-words, but preferentially to pseudo-words. In addition, this region is known to express reduced BOLD amplitude to  
257 false-font items compared to items composed of orthographically legal characters (48).

258 The region was defined in each subject through a series of masking operations implemented with AFNI's voxel-wise dataset  
259 calculator *3dcalc*. These operations were performed on the  $t$ -statistics from the 1mm smoothed, native space analysis. First,  
260 voxels were removed if they did not reach threshold in both the word and pseudo-word conditions. This was defined as a  
261  $t$ -statistic where  $1 \leq t \leq 3$ .  $T$  was initially set to  $t = 2$  and was increased or reduced if the number of surviving voxels fell  
262 outside of the desired range (see below). We then removed all voxels with a larger  $t$ -statistic for the false-font condition than  
263 for either the word or pseudo-word conditions. Finally, voxels were excluded if the difference between  $t$ -statistics of words  
264 and pseudo-words was larger than the original activation threshold. Clusters were considered for inclusion if they were 1)  
265 located within the extent of the occipitotemporal sulcus, if 2) cluster size was between 100 and 400 voxels, if 3) 30-50%  
266 of the voxels responded preferentially to the word condition over the pseudo-word condition, and if 4) the total response was  
267 comparable between the word and pseudo-word preferred voxels when considering the proportion of voxels preferring each  
268 condition. These criteria were selected to isolate a functional region which is known to respond preferentially to both words  
269 and pseudo-words compared to false-font items, prefer pseudo-words to words, and contain a mixture of individual voxels which  
270 prefer each condition. The fROI selection procedure was biased by design toward pseudo-word activation because stronger  
271 pseudo-word activation is a functional feature of the region (48).

272 Further considerations were made with respect to the importance of cluster contiguity. Given the high spatial resolution of  
273 our data, it was possible to distinguish populations of active voxels spanning the CSF boundary bridging the occipitotemporal  
274 sulcus. Following the removal of the voxels located in CSF in some subjects, formerly contiguous clusters became distinguishable.  
275 We determined that the most reasonable approach was to include formerly contiguous voxels in the laminar analysis. Given that  
276 this region is often functionally defined and generally identified near the fundus of the occipitotemporal sulcus, partial volume  
277 effects have almost certainly influenced fMRI measurements at standard resolutions. The decision to exclude populations  
278 of voxels stranded on either side of the chasm would have proven arbitrary in that non-laminar studies investigating this  
279 region typically lack the resolution to distinguish fusiform and inferior temporal populations. We concluded that allowing for  
280 discontinuities in the left OTS fROI more faithfully adhered to the literature definition of the region than an ad hoc justification  
281 for voxel removal. Native space functional ROIs for all participants can be seen in figures S3 and S4.

282 **Depth dependent signal extraction.** The fROI produced through the procedure described above was used to mask the layer-  
283 volume distribution. This resulted in a layer-volume distribution specific to the fROI. By treating this distribution as a design  
284 matrix such that rows were voxels and columns were bins, it was possible to regress it against the signal observed in the fROI  
285 for each time point in the experiment (49, 50).

286 Fitting the voxel-volume distribution to each time point in the experiment yielded the relative contribution of each bin  
287 to the overall signal at each time point, thereby representing a depth dependent time-series for each depth bin. These were  
288 treated similarly to voxel time-courses and used to fit the task design.

289 The task design model was then fitted to the extracted depth dependent time courses. Percent signal change was calculated  
290 as a division between  $\beta$ -weights assigned to each condition and the average weight assigned to the constant terms. The percent  
291 signal change values were then analyzed at the group level in an ANOVA and subsequent two-tailed, paired  $t$ -test comparing  
292 the responses to words and pseudo-words.  $T$ -statistics and ANOVA results were determined to be significant at  $p = 0.01$ .  
293 These analyses were implemented in MATLAB.

## 294 **Statistical analysis.**

295 **Intraregional gPPI.** The gPPI analysis is a generalized version of the PPI analysis. In the generalized form, the analysis is designed  
296 to span the full experiment space (51). In gPPI analysis, the first level model is extended by including the time-course of a  
297 seed region in addition to interaction terms of the seed region with each task condition regressor.

298 As the goal of this analysis is to observe the effect of the interaction between the task and the neuronal response of a seed  
299 region, a deconvolution is typically applied to the seed time-course before computing the interaction term. Given the problems  
300 associated with deconvolution (52) and the novel nature of this work, we omitted deconvolution from our gPPI analysis. The  
301 depth dependent hemodynamic response function (HRF) is not well understood. In the absence of this knowledge, the task

302 regressors used in this experiment were created using the canonical HRF. Deconvolution based on the canonical HRF would  
303 have therefore exacerbated errors in modeling introduced by the initial convolution. Furthermore, the design of this study  
304 sequentially presented five items of each condition type, essentially in 20 second blocks. O'Reilly et al. (52) have shown that  
305 omitting deconvolution is not expected to greatly affect the outcome in block designs such as that used in the present study. We  
306 therefore considered it more prudent to omit rather than include deconvolution in this analysis. There is no known precedent  
307 for laminar specific gPPI. The gPPI design was created by adding seed region time-courses and interaction terms to the original  
308 design. Interaction terms were calculated as the product of the detrended depth dependent time-series and binary condition  
309 vectors (1 when a condition response was expected, 0 when it was not) derived from the task regressors. A time point was  
310 included in the interaction term if the task regressor diverged from 0 by 0.0001.

311 Different models were created for each inter-regional analysis to assess the interaction between two depth- bins while  
312 alternating seed/target assignment. We did not model the third remaining bin. Six models were created in total, each containing  
313 six interaction terms (each of the six conditions multiplied by the seed-region time-course), the seed-region itself, and the  
314 full design as discussed previously. Group effects were assessed using AFNI's *3dANOVA3*. Paired two-tailed *t*-statistics were  
315 computed on the word and pseudo-word condition contrast. Results were deemed significant at  $p = 0.01$ .

316 **Bin to whole brain gPPI.** In a separate gPPI analysis, we modeled the task-dependent effect of the deep and middle bins on the  
317 whole brain. The superficial bin was excluded from the whole brain gPPI for several reasons. The LOTS is hypothesized to  
318 connect to left temporal cortex through either primarily bottom-up or top-down configurations (48). To distinguish among these  
319 and thus explore the ability of fMRI to distinguish between top-down from bottom-up network arrangements, it was necessary  
320 only to include the predicted top-down and bottom-up bins associated with word reading. Voxels within the superficial bin are  
321 also susceptible to partial volume artifacts due to vessels on the pial surface, which could possibly affect the analysis. The  
322 inclusion of the superficial bin would have required the gPPI model to include ten additional regression terms which would  
323 have been collinear with the experimentally interesting deep and middle bin terms, and so this was not considered further in  
324 the interests of a parsimonious data analysis.

325 The analysis was performed on the MNI normalized data with a 4mm Gaussian smoothing kernel applied. Alignment quality  
326 was assessed partially on the basis of alignment accuracy of the middle temporal gyrus. Individual subject *t*-statistic maps were  
327 used in conjunction with subject anatomy and the MNI template used for normalization to determine the alignment quality of  
328 task critical regions. Inaccuracies in subject registrations were addressed with a manually created, secondary transformation  
329 containing small translations intended to improve task critical region alignment without introducing large global inaccuracies.  
330 As the experimental question related to the depth dependent connectivity to regions that respond to the word/pseudo-word  
331 contrast, the use of the non-laminar first level maps to facilitate alignment was independent of the gPPI analysis. Group results  
332 were assessed using AFNI's *3dANOVA3*, as in the previous section.

333 The parameters of the spatial AutoCorrelation Function (ACF) representing the smoothness of the data were computed  
334 using AFNI's *3dFWHMx* on the residual time-series of first level analysis. The ACF parameters were used by the AFNI  
335 program *3dClustSim* to compute the likelihood of random clusters given the ACF parameters 0.5815, 2.9134 and 8.3001, in a  
336 volume of the dimensions  $63 \times 82 \times 55$  with 2mm isotropic voxels. The dimensions of the volume used for permutation testing  
337 were determined with a group level functional data mask. Clusters were deemed significant at  $p_{\text{uncorr}} = 0.001$ ,  $\alpha = 0.05$ .

338 The task-independent connectivity from the deep and middle bins was assessed using the deep and middle bin time-courses  
339 included in the gPPI model. The final results were visualized using the rendering plugin in AFNI. In addition to subjects  
340 2 and 19, subject 4 was excluded from this analysis. We were unable to successfully bring subject 4 into MNI space. Large  
341 inaccuracies in the registration resulted in the exclusion of this subject from the whole brain analysis. This subject was included  
342 in all analyses performed in native space.

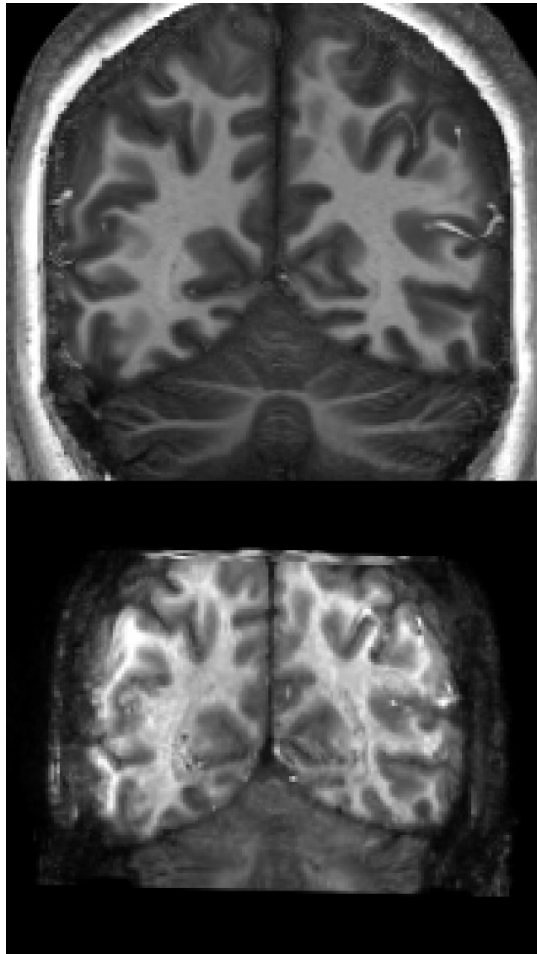

**Fig. S1.** Different anatomy acquisitions used in this experiment. MP2RAGE (top), IR-EPI (bottom). The left hemisphere is shown on the right side of the images.



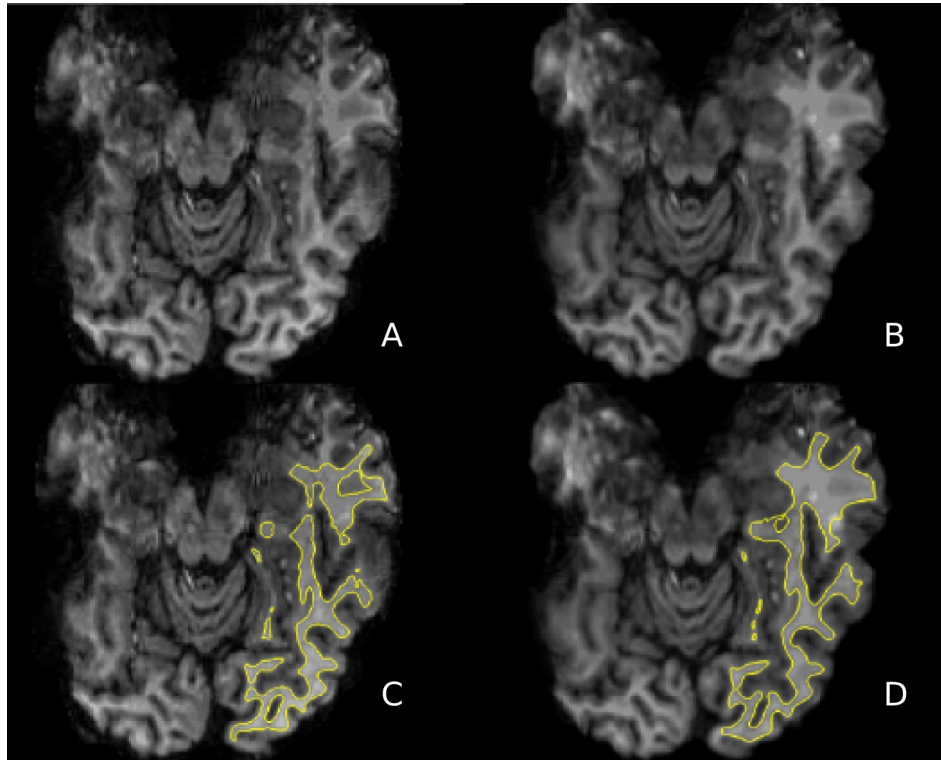

**Fig. S2.** Comparison of FreeSurfer white matter surface generation on the left hemisphere before and after supplemental B1 correction. (A) uncorrected; (B) corrected; (C) surfaces generated from A; (D) surfaces generated from B. The left hemisphere is shown on the right side of the image.

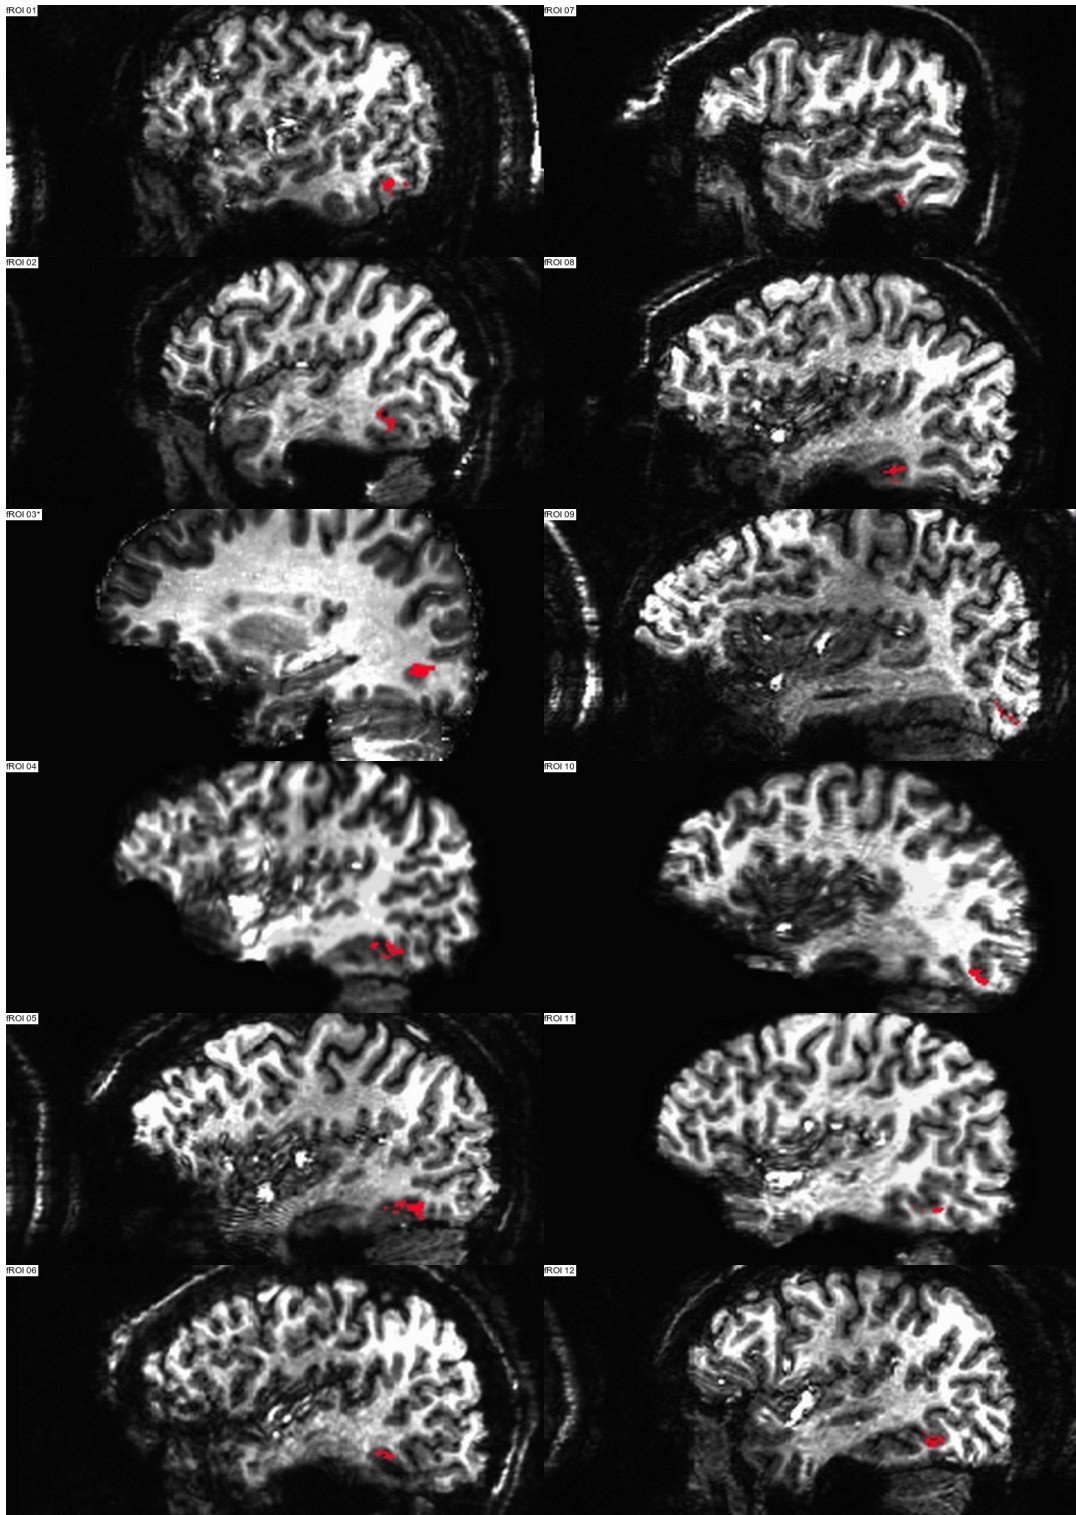

**Fig. S3.** Native space fROIs 1-12  
\*Subject 03 excluded from whole-brain gPPI analysis

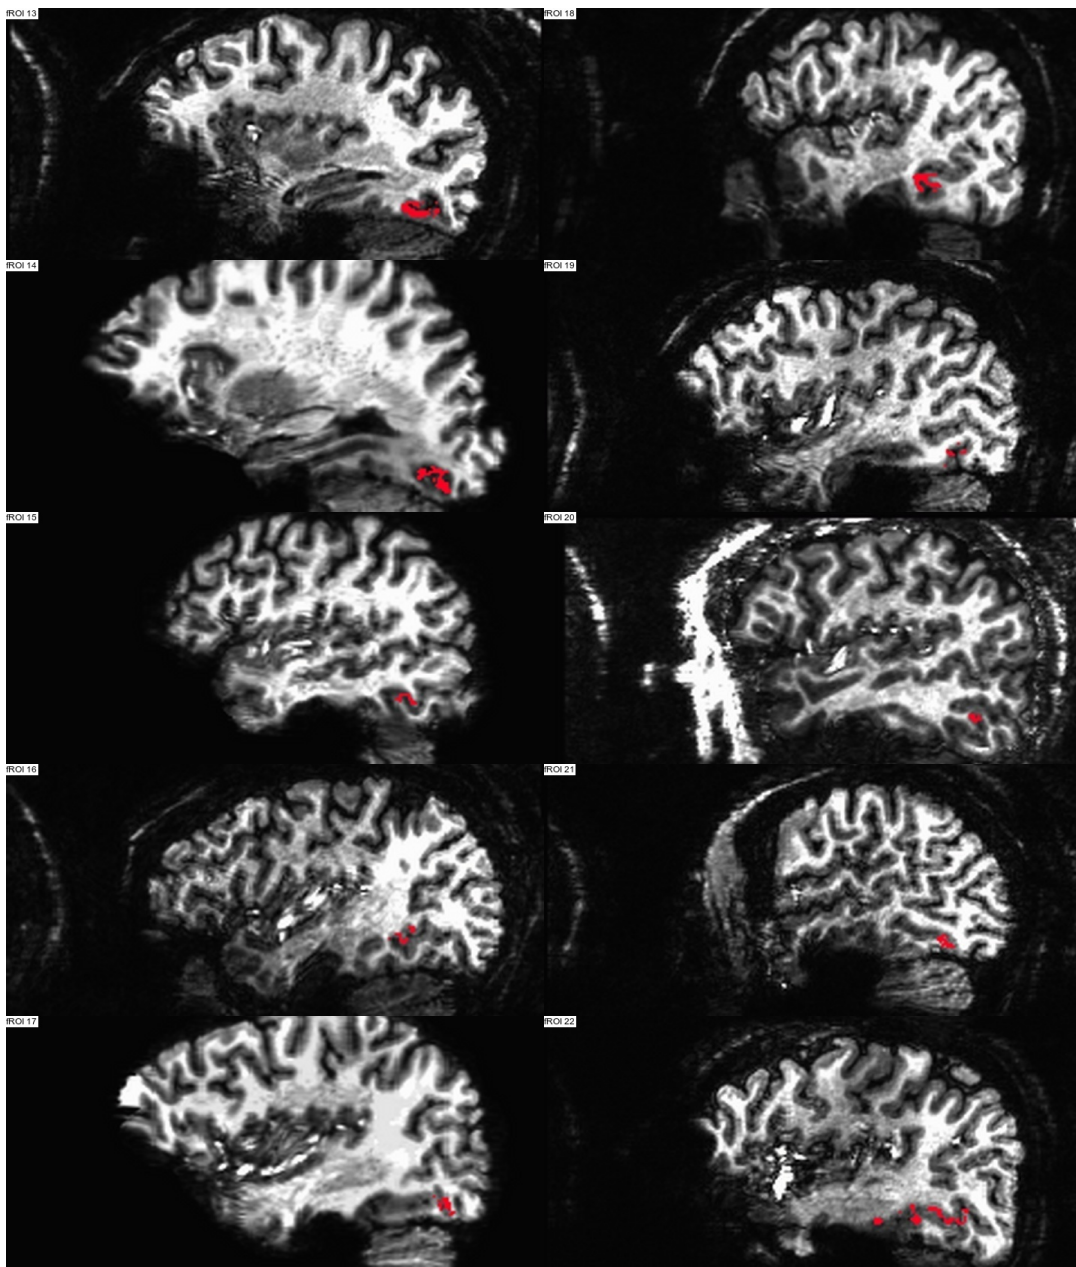

Fig. S4. Native pace fROIs 13-22

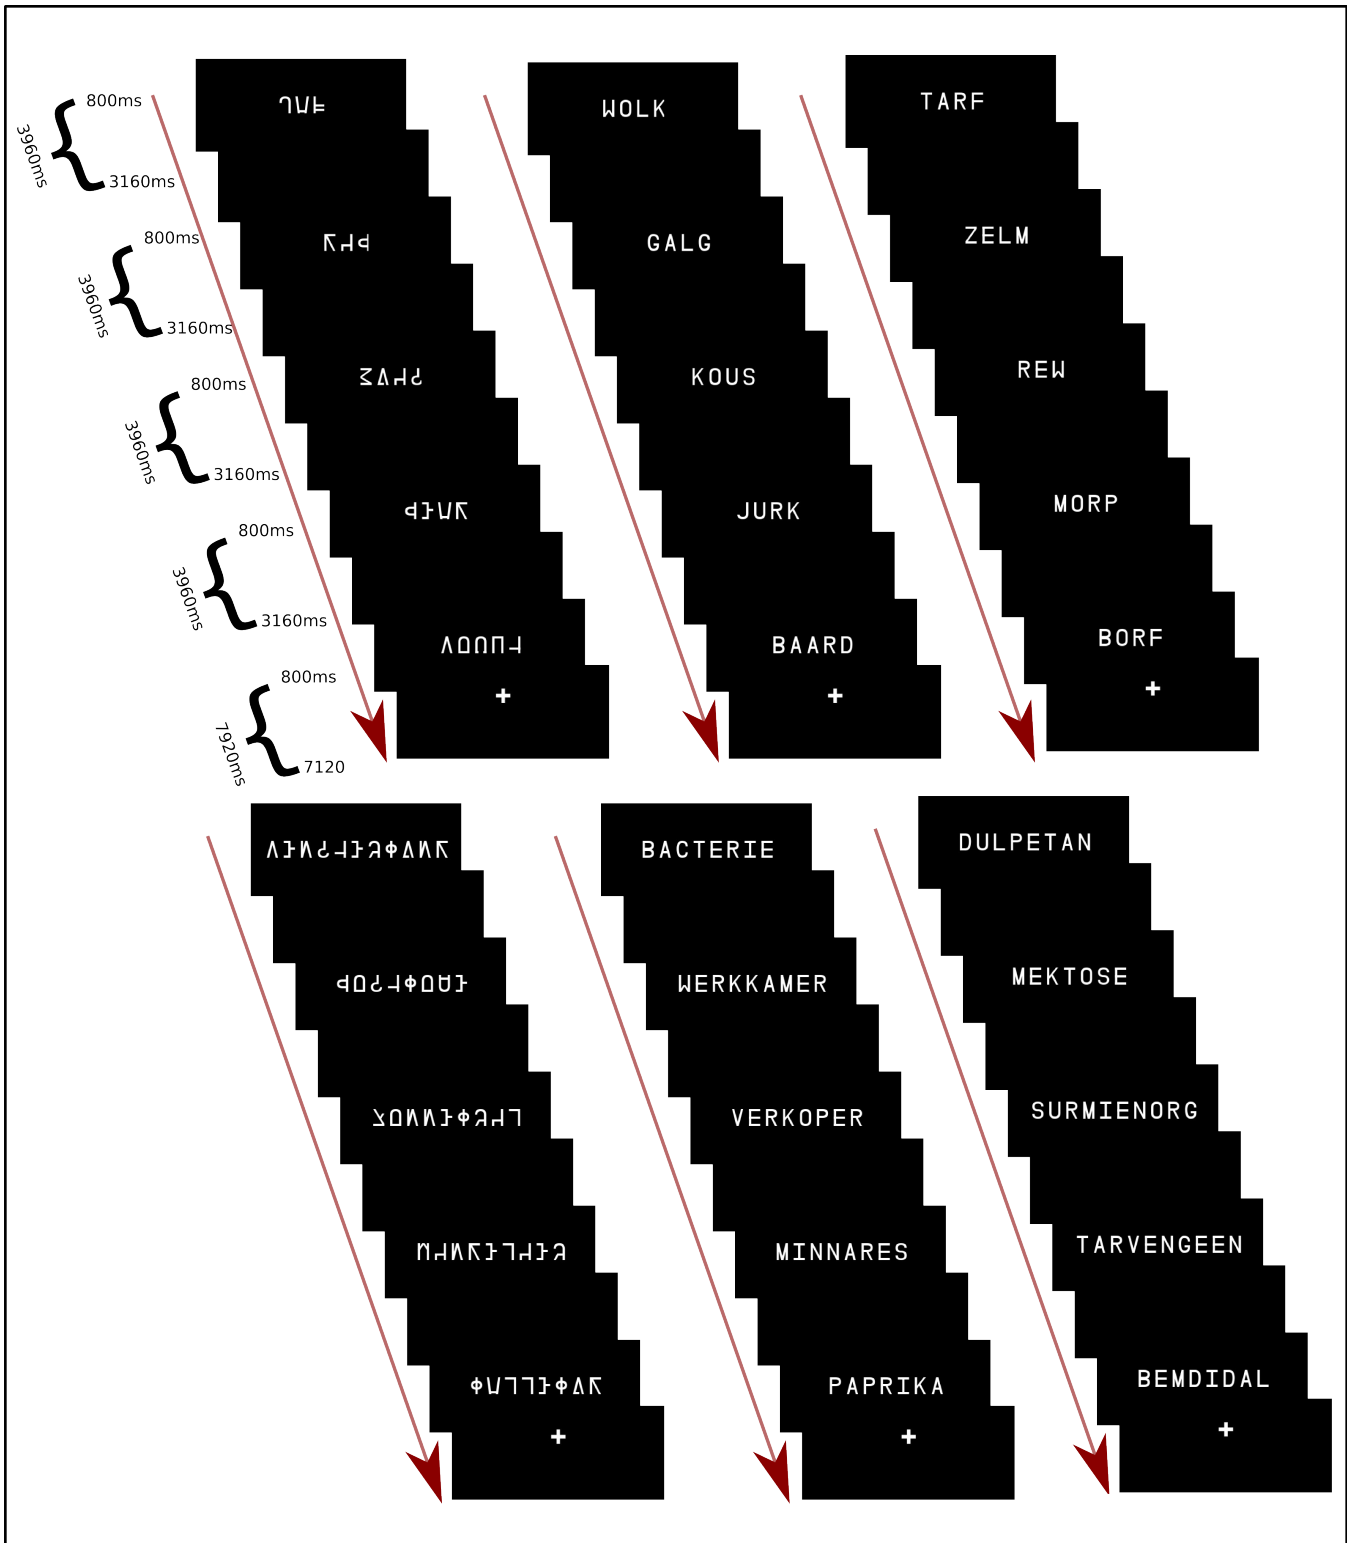

**Fig. S5.** Sample stimuli showing mini-blocks from each condition. Stimuli were presented in 5 trial mini-blocks with the items from the same condition presented in the trials within a block. The duration of each trial was 3960 ms. Each item was presented for 800 ms within the 3960 ms according to parameters obtained using optseq2. A black screen was presented for the remaining 3160 ms in each trial. A fixation was presented for the duration of one trial (3960 ms) at the beginning of each run and following each mini-block. From left to right: false fonts, words, pseudo-words. One syllable items are shown in the top portion and three syllable items are shown on the bottom.

343 **Additional data table S1 (StimulusList.xlsx)**

344 word and pseudo-word items

345 **Additional data table S2 (FalseFontItems.pdf)**

346 false-font items

## 347 **References**

- 348 1. Kok P, Bains LJ, van Mourik T, Norris DG, de Lange FP (2016) Selective activation of the deep layers of the human  
349 primary visual cortex by top-down feedback. *Current Biology* 26(3):371–6.
- 350 2. Baayen RH, Piepenbrock R, Gulikers L (1995) The celex lexical database (release 2).
- 351 3. Keuleers E, Brysbaert M (2010) Wuggy: A multilingual pseudoword generator. *Behavior Research Methods* 42(3):627–633.
- 352 4. Cohen L, et al. (2002) Language-specific tuning of visual cortex? functional properties of the visual word form area. *Brain*  
353 125(Pt 5):1054–69.
- 354 5. Dale AM (1999) Optimal experimental design for event-related fmri. *Human Brain Mapping* 8(2-3):109–114.
- 355 6. Penny WD, Friston KJ, Ashburner JT, Kiebel SJ, Nichols TE (2011) *Statistical parametric mapping: the analysis of*  
356 *functional brain images*. (Elsevier).
- 357 7. Cox RW (1996) Afni: software for analysis and visualization of functional magnetic resonance neuroimages. *Computers*  
358 *and Biomedical Research* 29(3):162–173.
- 359 8. Poser BA, Koopmans PJ, Witzel T, Wald LL, Barth M (2010) Three dimensional echo-planar imaging at 7 tesla.  
360 *Neuroimage* 51(1):261–6.
- 361 9. Breuer FA, et al. (2005) Controlled aliasing in parallel imaging results in higher acceleration (caipirinha) for multi-slice  
362 imaging. *Magnetic Resonance in Medicine* 53(3):684–691.
- 363 10. Setsompop K, et al. (2012) Blipped-controlled aliasing in parallel imaging for simultaneous multislice echo planar imaging  
364 with reduced g-factor penalty. *Magnetic Resonance in Medicine* 67(5):1210–1224.
- 365 11. Marques JP, et al. (2010) Mp2rage, a self bias-field corrected sequence for improved segmentation and t1-mapping at high  
366 field. *Neuroimage* 49(2):1271–1281.
- 367 12. Dumoulin SO, Fracasso A, van der Zwaag W, Siero JC, Petridou N (2018) Ultra-high field mri: advancing systems  
368 neuroscience towards mesoscopic human brain function. *Neuroimage* 168:345–357.
- 369 13. O’Herron P, et al. (2016) Neural correlates of single-vessel haemodynamic responses in vivo. *Nature* 534(7607):378.
- 370 14. Yacoub E, et al. (2003) Spin-echo fmri in humans using high spatial resolutions and high magnetic fields. *Magnetic*  
371 *Resonance in Medicine* 49(4):655–64.
- 372 15. Lee SP, Silva AC, Uğurbil K, Kim SG (1999) Diffusion-weighted spin-echo fmri at 9.4 t: microvascular/tissue contribution  
373 to bold signal changes. *Magnetic Resonance in Medicine* 42(5):919–28.
- 374 16. Duong TQ, et al. (2003) Microvascular bold contribution at 4 and 7 t in the human brain: gradient-echo and spin-echo  
375 fmri with suppression of blood effects. *Magnetic Resonance in Medicine* 49(6):1019–27.
- 376 17. Goense J, Logothetis NK (2006) Laminar specificity in monkey v1 using high-resolution se-fmri. *Magnetic Resonance*  
377 *Imaging* 24(4):381 – 392.
- 378 18. Harel N, Lin J, Moeller S, Uğurbil K, Yacoub E (2006) Combined imaging-histological study of cortical laminar specificity  
379 of fmri signals. *Neuroimage* 29(3):879–87.
- 380 19. Kim T, Hendrich KS, Masamoto K, Kim SG (2007) Arterial versus total blood volume changes during neural activity-  
381 induced cerebral blood flow change: implication for bold fmri. *Journal of Cerebral Bloodflow Metabolism* 27(6):1235–47.
- 382 20. Kim T, Kim SG (2010) Cortical layer-dependent arterial blood volume changes: improved spatial specificity relative to  
383 bold fmri. *Neuroimage* 49(2):1340–9.
- 384 21. Lu H, et al. (2004) Spatial correlations of laminar bold and cbv responses to rat whisker stimulation with neuronal activity  
385 localized by fos expression. *Magnetic Resonance in Medicine* 52(5):1060–8.
- 386 22. Silva AC, Koretsky AP (2002) Laminar specificity of functional mri onset times during somatosensory stimulation in rat.  
387 *Proceedings of the National Academy of Sciences U.S.A.* 99(23):15182–7.
- 388 23. Smirnakis SM, et al. (2007) Spatial specificity of bold versus cerebral blood volume fmri for mapping cortical organization.  
389 *Journal of Cerebral Bloodflow Metabolism* 27(6):1248–61.
- 390 24. Zappe AC, Pfeuffer J, Merkle H, Logothetis NK, Goense JB (2008) The effect of labeling parameters on perfusion-based  
391 fmri in nonhuman primates. *Journal of Cerebral Bloodflow Metabolism* 28(3):640–52.
- 392 25. Behzadi Y, Liu TT (2005) An arteriolar compliance model of the cerebral blood flow response to neural stimulus.  
393 *Neuroimage* 25(4):1100–11.
- 394 26. Devor A, et al. (2007) Suppressed neuronal activity and concurrent arteriolar vasoconstriction may explain negative blood  
395 oxygenation level-dependent signal. *Journal of Neuroscience.* 27(16):4452–9.
- 396 27. Hillman EM, et al. (2007) Depth-resolved optical imaging and microscopy of vascular compartment dynamics during  
397 somatosensory stimulation. *Neuroimage* 35(1):89–104.
- 398 28. Koopmans PJ, Barth M, Norris DG (2010) Layer-specific bold activation in human v1. *Human Brain Mapping* 31(9):1297–  
399 1304.

- 400 29. Ress D, Glover GH, Liu J, Wandell B (2007) Laminar profiles of functional activity in the human brain. *Neuroimage*  
401 34(1):74–84.
- 402 30. Polimeni JR, Fischl B, Greve DN, Wald LL (2010) Laminar analysis of 7t bold using an imposed spatial activation pattern  
403 in human v1. *Neuroimage* 52(4):1334–46.
- 404 31. Huber L, et al. (2014) Investigation of the neurovascular coupling in positive and negative bold responses in human brain  
405 at 7 t. *Neuroimage* 97:349–62.
- 406 32. Huber L, et al. (2015) Cortical lamina-dependent blood volume changes in human brain at 7 t. *Neuroimage* 107:23–33.
- 407 33. Huber L, et al. (2017) High-resolution cbv-fmri allows mapping of laminar activity and connectivity of cortical input and  
408 output in human m1. *Neuron* 96(6):1253–1263.e7.
- 409 34. Olman CA, et al. (2012) Layer-specific fmri reflects different neuronal computations at different depths in human v1.  
410 *PLoS One* 7(3):e32536.
- 411 35. De Martino F, et al. (2013) Cortical depth dependent functional responses in humans at 7t: improved specificity with 3d  
412 grase. *PLoS One* 8(3):e60514.
- 413 36. Kemper VG, De Martino F, Yacoub E, Goebel R (2016) Variable flip angle 3d-grase for high resolution fmri at 7 tesla.  
414 *Magnetic Resonance in Medicine* 76(3):897–904.
- 415 37. Muckli L, et al. (2015) Contextual feedback to superficial layers of v1. *Current Biology* 25(20):2690 – 2695.
- 416 38. Moerel M, et al. (2018) Sensitivity and specificity considerations for fmri encoding, decoding, and mapping of auditory  
417 cortex at ultra-high field. *Neuroimage* 164:18–31.
- 418 39. Markuerkiaga I, Barth M, Norris DG (2016) A cortical vascular model for examining the specificity of the laminar bold  
419 signal. *Neuroimage* 132:491–8.
- 420 40. Fischl B (2012) Freesurfer. *NeuroImage* 62(2):774 – 781.
- 421 41. van Mourik T, Koopmans PJ, Norris DG (2018) Improved cortical boundary registration for locally distorted fmri scans.
- 422 42. Waehnert M, et al. (2014) Anatomically motivated modeling of cortical laminae. *NeuroImage* 93, Part 2:210 – 220.
- 423 43. De Martino F, et al. (2015) Frequency preference and attention effects across cortical depths in the human primary  
424 auditory cortex. *Proceedings of the National Academy of Sciences U.S.A.* 112(52):16036–41.
- 425 44. Lawrence S, et al. (2018) Laminar organization of working memory signals in human visual cortex. *Current Biology*  
426 28(21):3435 – 3440.e4.
- 427 45. Rockland KS, Pandya DN (1979) Laminar origins and terminations of cortical connections of the occipital lobe in the  
428 rhesus monkey. *Brain Research* 179(1):3 – 20.
- 429 46. Felleman DJ, Van Essen D (1991) Distributed hierarchical processing in the primate cerebral cortex. *Cerebral Cortex*  
430 1(1):1–47.
- 431 47. Kasper L, et al. (2017) The physio toolbox for modeling physiological noise in fmri data. *Journal of Neuroscience Methods*  
432 276:56–72.
- 433 48. Price CJ (2012) A review and synthesis of the first 20 years of pet and fmri studies of heard speech, spoken language and  
434 reading. *Neuroimage* 62(2):816–47.
- 435 49. van Mourik T, van der Eerden JP, Bazin PL, Norris DG (2019) Laminar signal extraction over extended cortical areas by  
436 means of a spatial glm. *PLoS One* 14(3):e0212493.
- 437 50. Polimeni JR, Greve DN, Fischl B, Wald LL (2010) Depth-resolved laminar analysis of resting-state fluctuation amplitude  
438 in high-resolution 7t fmri. Proceedings: 18th Annual Meeting International Society for Magnetic Resonance in Medicine,  
439 Stockholm, p. 1168.
- 440 51. McLaren DG, Ries ML, Xu G, Johnson SC (2012) A generalized form of context-dependent psychophysiological interactions  
441 (gppi): A comparison to standard approaches. *NeuroImage* 61(4):1277 – 1286.
- 442 52. O'Reilly JX, Woolrich MW, Behrens TE, Smith SM, Johansen-Berg H (2012) Tools of the trade: psychophysiological  
443 interactions and functional connectivity. *Social Cognitive and Affective Neuroscience* 7(5):604–609.
