# Supplementary material
Source: PubMed Central journal article supplement (PMC6800353)
Supplement: pnas.1907858116.sd02.pdf [file pnas.1907858116.sd02.pdf]

|    | <b>False font</b> | <b>False font</b> |
|----|-------------------|-------------------|
|    | <b>Short</b>      | <b>Long</b>       |
| 1  | ፋለገኔ              | ፋለበዳድደራ           |
| 2  | በዳገዎ              | በለራታለዩንገ          |
| 3  | ኔዐገ               | ኔዳህህገዳዳዩ          |
| 4  | ገዐህራ              | ገዳዳገንገታገንዳ        |
| 5  | ለዐበበታ             | ለንገገገንገንገንገ       |
| 6  | ገዐኔፋ              | ታንበበዳዳዐህራ         |
| 7  | ፋዳዳገ              | ፋለገገንገንገገለለታ      |
| 8  | ዎዳዩ               | ዎለራፋንህለለገ         |
| 9  | ገህኔ               | ታንዳታለገንገ          |
| 10 | ገዐንገ              | ገለኔፋዳዐዳ           |
| 11 | ዎዳፋራ              | በለዳህገገለለገ         |
| 12 | ህለገኔ              | በለፋራህገንገ          |
| 13 | በዐገፋ              | በዳዳገንገዳንገ         |
| 14 | ገለለዩ              | ፋዐራታገለለዳዐዐገ       |
| 15 | ገዐገ               | ታለዳህፋለራታ          |
| 16 | ለዳዳ               | ለንገገገገገገንገ        |
| 17 | ገንዳ               | ገንገገዳዳፋንዳ         |
| 18 | ገለታ               | ኔለበበዳዳደራ          |
| 19 | ህለህገ              | በለፋህበበዐዳ          |
| 20 | ታለዳህ              | ለንዳራታንገገገለገ       |
| 21 | ዎለራታ              | ህዳራገንታንገ          |
| 22 | ፋዳታ               | ፋለታንገንገ           |
| 23 | ፋለለገህ             | ፋለበታንገንገ          |
| 24 | ገዐታራ              | ታንዳዳደራፋለለዳ        |
| 25 | ፋህራ               | ፋዐራታፋዐህገ          |
| 26 | ገህፋራ              | ታንኔኔንገገገለገ        |
| 27 | ኔዐራ               | ኔዳገገገገገለገ         |
| 28 | ህዐዳራ              | በዐዳበዳንገገንገ        |
| 29 | ፋለህገ              | ፋለዳታለገገገ          |
| 30 | ገህዩ               | ገለገህዳዳለገ          |
| 31 | ፋዐታ               | ፋዳዳዳንዳህገ          |
| 32 | ገዳፋ               | ራለገህዳዳ            |
| 33 | በለለራ              | ለዳዳገንገገገገ         |
| 34 | ህዳንገ              | በበለኔፋዳዳዳዳ         |
| 35 | ፋዐንገ              | ፋለራራለገገንገ         |
| 36 | ገዐንፋ              | ኔለዳንገዳ            |
| 37 | በንኔህ              | ገለኔፋዳዐንዳ          |
| 38 | ፋንገኔ              | ፋለገገለህገ           |

|    |       |              |
|----|-------|--------------|
| 39 | ገዝብ   | ጌላላህዳገዝ      |
| 40 | በዘንገ  | ጽላጽጽጽጽጽ      |
| 41 | ቀሠዘገ  | ቀሠገገንቀልጽ     |
| 42 | ገለጸሪ  | ገሠበብ-በለለንዝ   |
| 43 | ለለላሪ  | ለንገጽገጽገጽ     |
| 44 | ዩንገ   | በወጸህህህህ      |
| 45 | ጌንደሪ  | ጌን-ህንገለላገ    |
| 46 | ዮንዝ   | ዩለቀገገጽጽ      |
| 47 | ጽዕገሪ  | ገንጋጋንዝጽጽ     |
| 48 | ቀሠዘገ  | ቀሠሪበለገ-ገን    |
| 49 | በንገሪ  | ጽላጽገንገለላገ    |
| 50 | ጌላገ   | ጌላጽገላገገጽ     |
| 51 | ህለገጌ  | ህዝ-ጽላጌገንገ    |
| 52 | ገለጌገ  | ገዝ-ህንገገጽ     |
| 53 | ለለበብ  | ለንገጽገገገጽ     |
| 54 | ገሠገጽ  | ጽላጌ-ህለገገን    |
| 55 | ቀሠሪ   | በለገገገህህ      |
| 56 | ዮንዝገ  | ዩወገጌህገገገጽ    |
| 57 | በንገጽ  | በወጋገገ-ህለገገ   |
| 58 | በወገጽ  | በን-ህበወህገገጽ   |
| 59 | ቀወገጽ  | ቀዝገገገገገገጽ    |
| 60 | ዝለለጽ  | ዝለበብ-ጽላጌ-ህገገ |
| 61 | በንገጌ  | ገለበብ-ዮንገገገጽ  |
| 62 | ህለገዩ  | ህለገዮንገገገጽ    |
| 63 | ገንገገ  | ገለገገገገገገጽ    |
| 64 | በለገገ  | በዝገገገገገገጽ    |
| 65 | ገንገገጽ | ገለገገገገገገጽ    |
| 66 | ህለለጽ  | ህለገገገገገገገጽ   |
| 67 | ዮንገገ  | ህወቀቀገገገገገጽ   |
| 68 | ቀወገዩ  | ቀንዝህዝገገጽ     |
| 69 | ዮለገገ  | ህለገገገገገገጽ    |
| 70 | ዮለገገ  | በወገገገገገገጽ    |
| 71 | ጌህሪ   | ዝለበብ-ገንገገገጽ  |
| 72 | ጋገለገገ | ህወገገገገገገጽ    |
| 73 | ገለገገ  | ገንገገገገገገገጽ   |
| 74 | በወገገ  | በንገገገገገገገጽ   |
| 75 | ህህዘገ  | ህወገገገገገገጽ    |
| 76 | ጽዝገ   | ጽወገገገገገገጽ    |
| 77 | ለንገገ  | ለንገገገገገገጽ    |
| 78 | ጽህገጽ  | ገዝገገገገገገጽ    |

|     |      |         |
|-----|------|---------|
| 79  | ጥዕና  | ገለጻቸዋል  |
| 80  | ጸሎት  | ጸንቦታቸውን |
| 81  | ጥገና  | ገለጻቸዋል  |
| 82  | ሁሉን  | በገንዘብ   |
| 83  | ጥገና  | ጥገናቸውን  |
| 84  | ገንዘብ | ገለጻቸዋል  |
| 85  | ጥገና  | ጥገናቸውን  |
| 86  | ገለጻ  | ገለጻቸዋል  |
| 87  | ጥገና  | ጥገናቸውን  |
| 88  | ጥገና  | ጥገናቸውን  |
| 89  | ጥገና  | ጥገናቸውን  |
| 90  | ጥገና  | ጥገናቸውን  |
| 91  | ጥገና  | ጥገናቸውን  |
| 92  | ጥገና  | ጥገናቸውን  |
| 93  | ጥገና  | ጥገናቸውን  |
| 94  | ጥገና  | ጥገናቸውን  |
| 95  | ጥገና  | ጥገናቸውን  |
| 96  | ጥገና  | ጥገናቸውን  |
| 97  | ጥገና  | ጥገናቸውን  |
| 98  | ጥገና  | ጥገናቸውን  |
| 99  | ጥገና  | ጥገናቸውን  |
| 100 | ጥገና  | ጥገናቸውን  |
| 101 | ጥገና  | ጥገናቸውን  |
| 102 | ጥገና  | ጥገናቸውን  |
| 103 | ጥገና  | ጥገናቸውን  |
| 104 | ጥገና  | ጥገናቸውን  |
| 105 | ጥገና  | ጥገናቸውን  |
| 106 | ጥገና  | ጥገናቸውን  |
| 107 | ጥገና  | ጥገናቸውን  |
| 108 | ጥገና  | ጥገናቸውን  |
| 109 | ጥገና  | ጥገናቸውን  |
| 110 | ጥገና  | ጥገናቸውን  |
| 111 | ጥገና  | ጥገናቸውን  |
| 112 | ጥገና  | ጥገናቸውን  |
| 113 | ጥገና  | ጥገናቸውን  |
| 114 | ጥገና  | ጥገናቸውን  |
| 115 | ጥገና  | ጥገናቸውን  |
| 116 | ጥገና  | ጥገናቸውን  |
| 117 | ጥገና  | ጥገናቸውን  |
| 118 | ጥገና  | ጥገናቸውን  |

119      ቅህረብ  
120      ጠለሪ

ቅጥርዕዓብ  
ጠገርዕዓብ
